# Supplementary material for: Phosphatidic Acid Stimulates Lung Cancer Cell Migration through Interaction with the LPA1 Receptor and Subsequent Activation of MAP Kinases and STAT3
Source: MDPI journal article supplement (doi:10.3390/biomedicines11071804), 2023-06-23
Supplement: s1 [file s1]

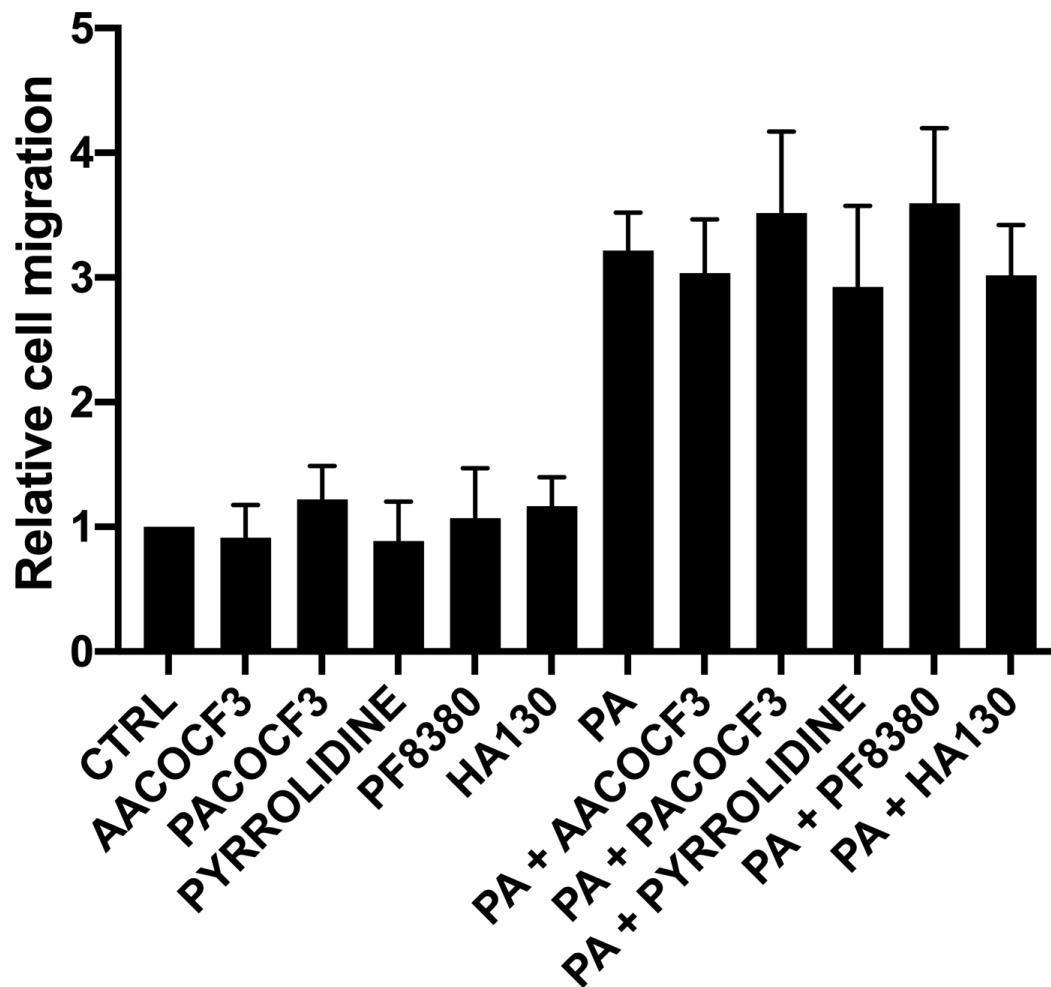

**Supplementary Figure S1.** Lack of effect of PLA<sub>2</sub> and autotaxin inhibitors on PA-stimulated A549 lung cancer cell migration. Cells were preincubated for 90 min with or without the specific cPLA<sub>2</sub> inhibitors AACOCF<sub>3</sub> (20  $\mu$ M), PACOCF<sub>3</sub> (20  $\mu$ M) and pyrrolidine (1  $\mu$ M), or with the autotaxin inhibitors PF8380 (300 nM) and HA130 (300 nM) as indicated, before stimulation with PA (10  $\mu$ M) and cell migration was measured as detailed in Materials and Methods. Data are expressed relative to the control value and are given as the mean  $\pm$  SD of 3 independent experiments performed in duplicate.
